# Supplementary material for: Doxycycline has distinct apicoplast-specific mechanisms of antimalarial activity
Source: eLife journal article supplement (doi:10.7554/elife.60246), 2020-11-02
Supplement: supp [file elife-60246-supp-v1.zip]

Archive with 7 entries (7 files):
- elife_poa_e60246_Transparent_Reporting_File.pdf
- elife_poa_e60246_Source_data_1.xlsx
- elife_poa_e60246_Figure_2_figure_supplement_1.jpg
- elife_poa_e60246_Figure_2_figure_supplement_2.jpg
- elife_poa_e60246_Figure_3_figure_supplement_1.jpg
- elife_poa_e60246_Figure_3_figure_supplement_2.jpg
- elife_poa_e60246_Figure_3_figure_supplement_3.jpg
