# Supplementary material for: Doxycycline has distinct apicoplast-specific mechanisms of antimalarial activity
Source: eLife journal article supplement (doi:10.7554/elife.60246), 2020-11-02
Supplement: supp [file elife-60246-supp-v1.zip › elife_poa_e60246_Source_data_1.xlsx]

## Sheet: Sheet1
	Source data for microscopy analyses in figure supplements
untreated (day 1)	elongated	punctate	disrupted	total parasites		elongated	punctate	disrupted	total parasites
slide 1	8	0	1	9		0.888889	0	0.111111	0.45
slide 2	10	0	1	11		0.909091	0	0.0909091	0.55
total	18	0	2	20		0.9	0	0.1	1
STDEV	1.41421	0	0			1.4285	0	1.4285
SEM	1	0	0			1.0101	0	1.0101
10 µM DOX (day 1)	elongated	punctate	disrupted	total parasites		elongated	punctate	disrupted	total parasites
slide 1	1	19	0	20		0.05	0.95	0	0.5
slide 2	0	19	1	20		0	0.95	0.05	0.5
total	1	38	1	40		0.025	0.95	0.025	1
STDEV	0.707107	0	0.707107			3.53553	0	3.53553
SEM	0.5	0	0.5			2.5	0	2.5
10 µM DOX+IPP (day 1)	elongated	punctate	disrupted	total parasites		elongated	punctate	disrupted	total parasites
slide 1	0	8	1	9		0	0.888889	0.111111	0.45
slide 2	0	8	3	11		0	0.727273	0.272727	0.55
total	0	16	4	20		0	0.8	0.2	1
STDEV	0	0	1.41421			0	11.428	11.428
SEM	0	0	1			0	8.08081	8.08081
10 µM DOX+CaCl2 (day 1)	elongated	punctate	disrupted	total parasites		elongated	punctate	disrupted	total parasites
slide 1	0	11	0	11		0	1	0	0.45
slide 2	0	9	0	9		0	1	0	0.55
total	0	20	0	20		0	1	0	1
STDEV	0	1.41421	0			0	0	0
SEM	0	1	0			0	0	0
10 µM DOX+FeCl3 (day 1)	elongated	punctate	disrupted	total parasites		elongated	punctate	disrupted	total parasites
slide 1	7	3	0	10		0.7	0.3	0	0.5
slide 2	8	0	2	10		0.8	0	0.2	0.5
total	15	3	2	20		0.75	0.15	0.1	1
STDEV	0.707107	2.12132	1.41421			7.07107	21.2132	14.1421
SEM	0.5	1.5	1			5	15	10
untreated (day 3)	elongated	punctate	disrupted	total parasites		elongated	punctate	disrupted	total parasites
slide 1	10	0	0	10		1	0	0	0.5
slide 2	10	0	0	10		1	0	0	0.5
total	20	0	0	20		1	0	0	1
STDEV	0	0	0			0	0	0
SEM	0	0	0			0	0	0
10 µM DOX+IPP (day 3)	elongated	punctate	disrupted	total parasites		elongated	punctate	disrupted	total parasites
slide 1	0	0	11	11		0	0	1	0.55
slide 2	0	1	8	9		0	0.111111	0.888889	0.45
total	0	1	19	20		0	0.05	0.95	1
STDEV	0	0.707107	2.12132			0	7.85674	7.85674
SEM	0	0.5	1.5			0	5.55556	5.55556
15 µM DFO (day 1)	elongated	punctate	disrupted	total parasites		elongated	punctate	disrupted	total parasites
slide 1	6	6	0	12		0.5	0.5	0	0.55
slide2	9	8	0	17		0.529412	0.470588	0	0.45
total	15	14	0	29		0.517241	0.482759	0	1
STDEV	2.12132	1.41421	0			2.07973	2.07973	0
SEM	1.5	1	0			1.47059	1.47059	0
