# Supplementary figures and images for: Doxycycline has distinct apicoplast-specific mechanisms of antimalarial activity
Source: eLife journal article supplement (doi:10.7554/elife.60246), 2020-11-02

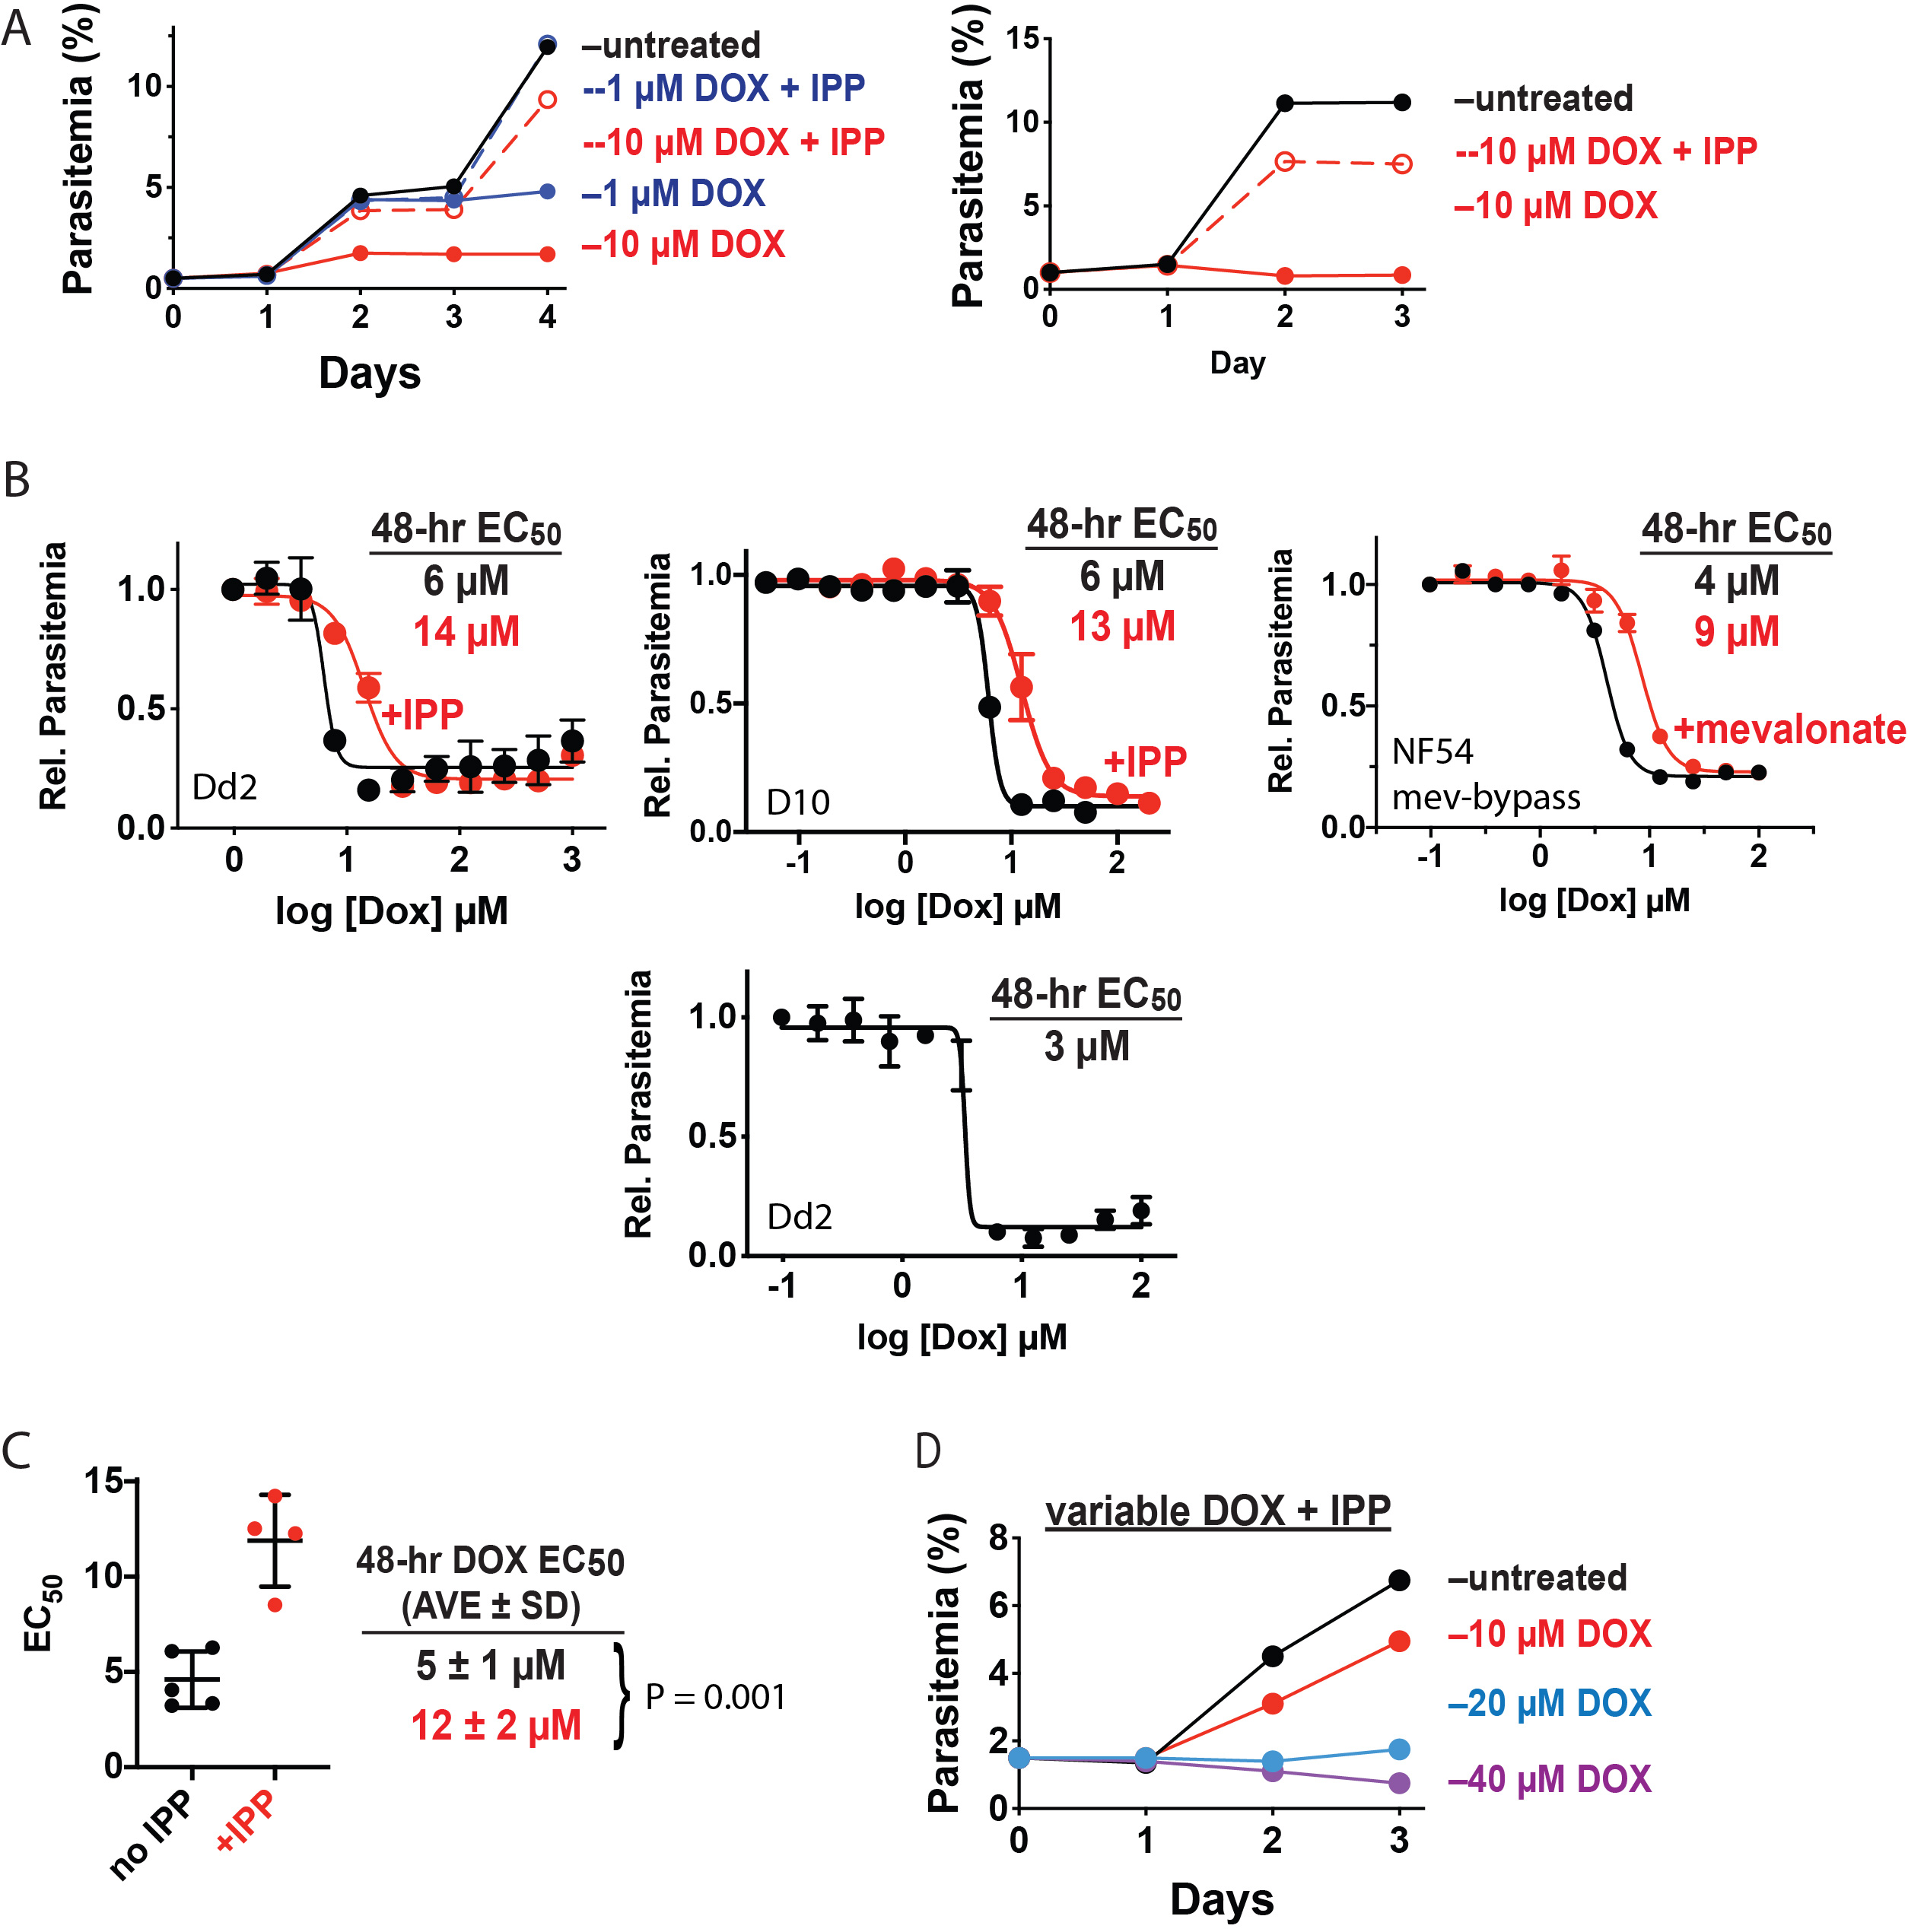

Supplement: supp [file elife-60246-supp-v1.zip › elife_poa_e60246_Figure_2_figure_supplement_1.jpg]

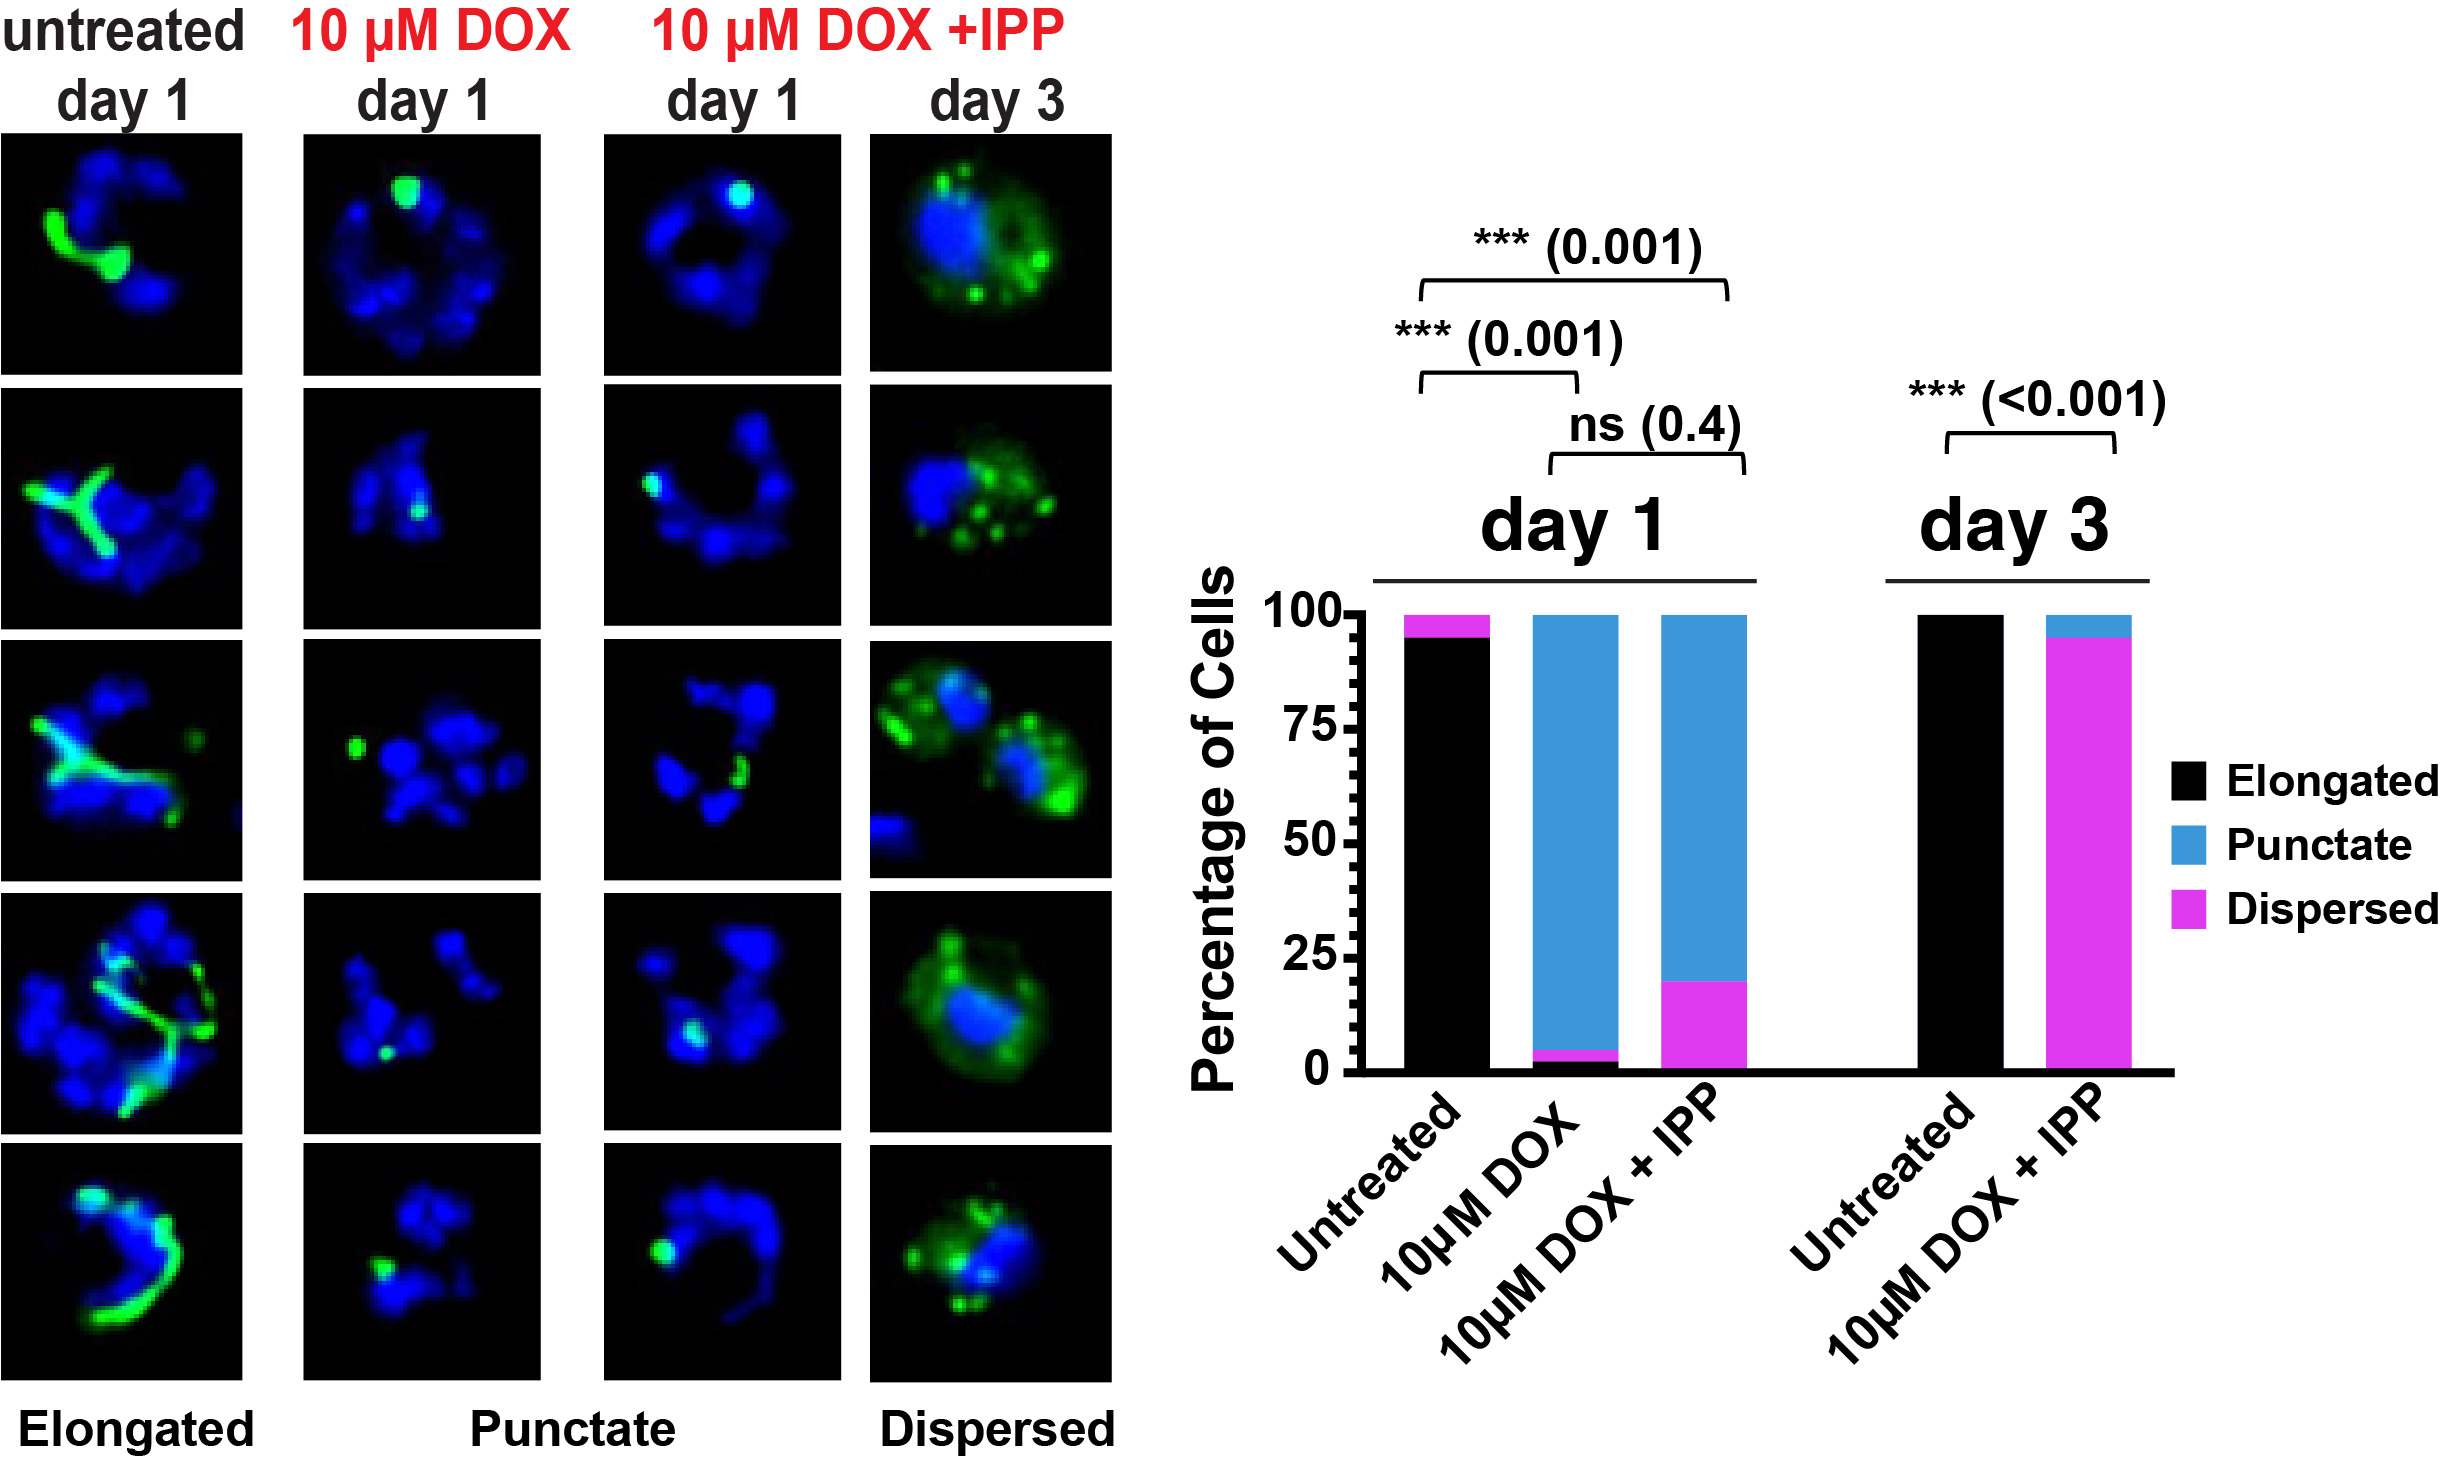

Supplement: supp [file elife-60246-supp-v1.zip › elife_poa_e60246_Figure_2_figure_supplement_2.jpg]

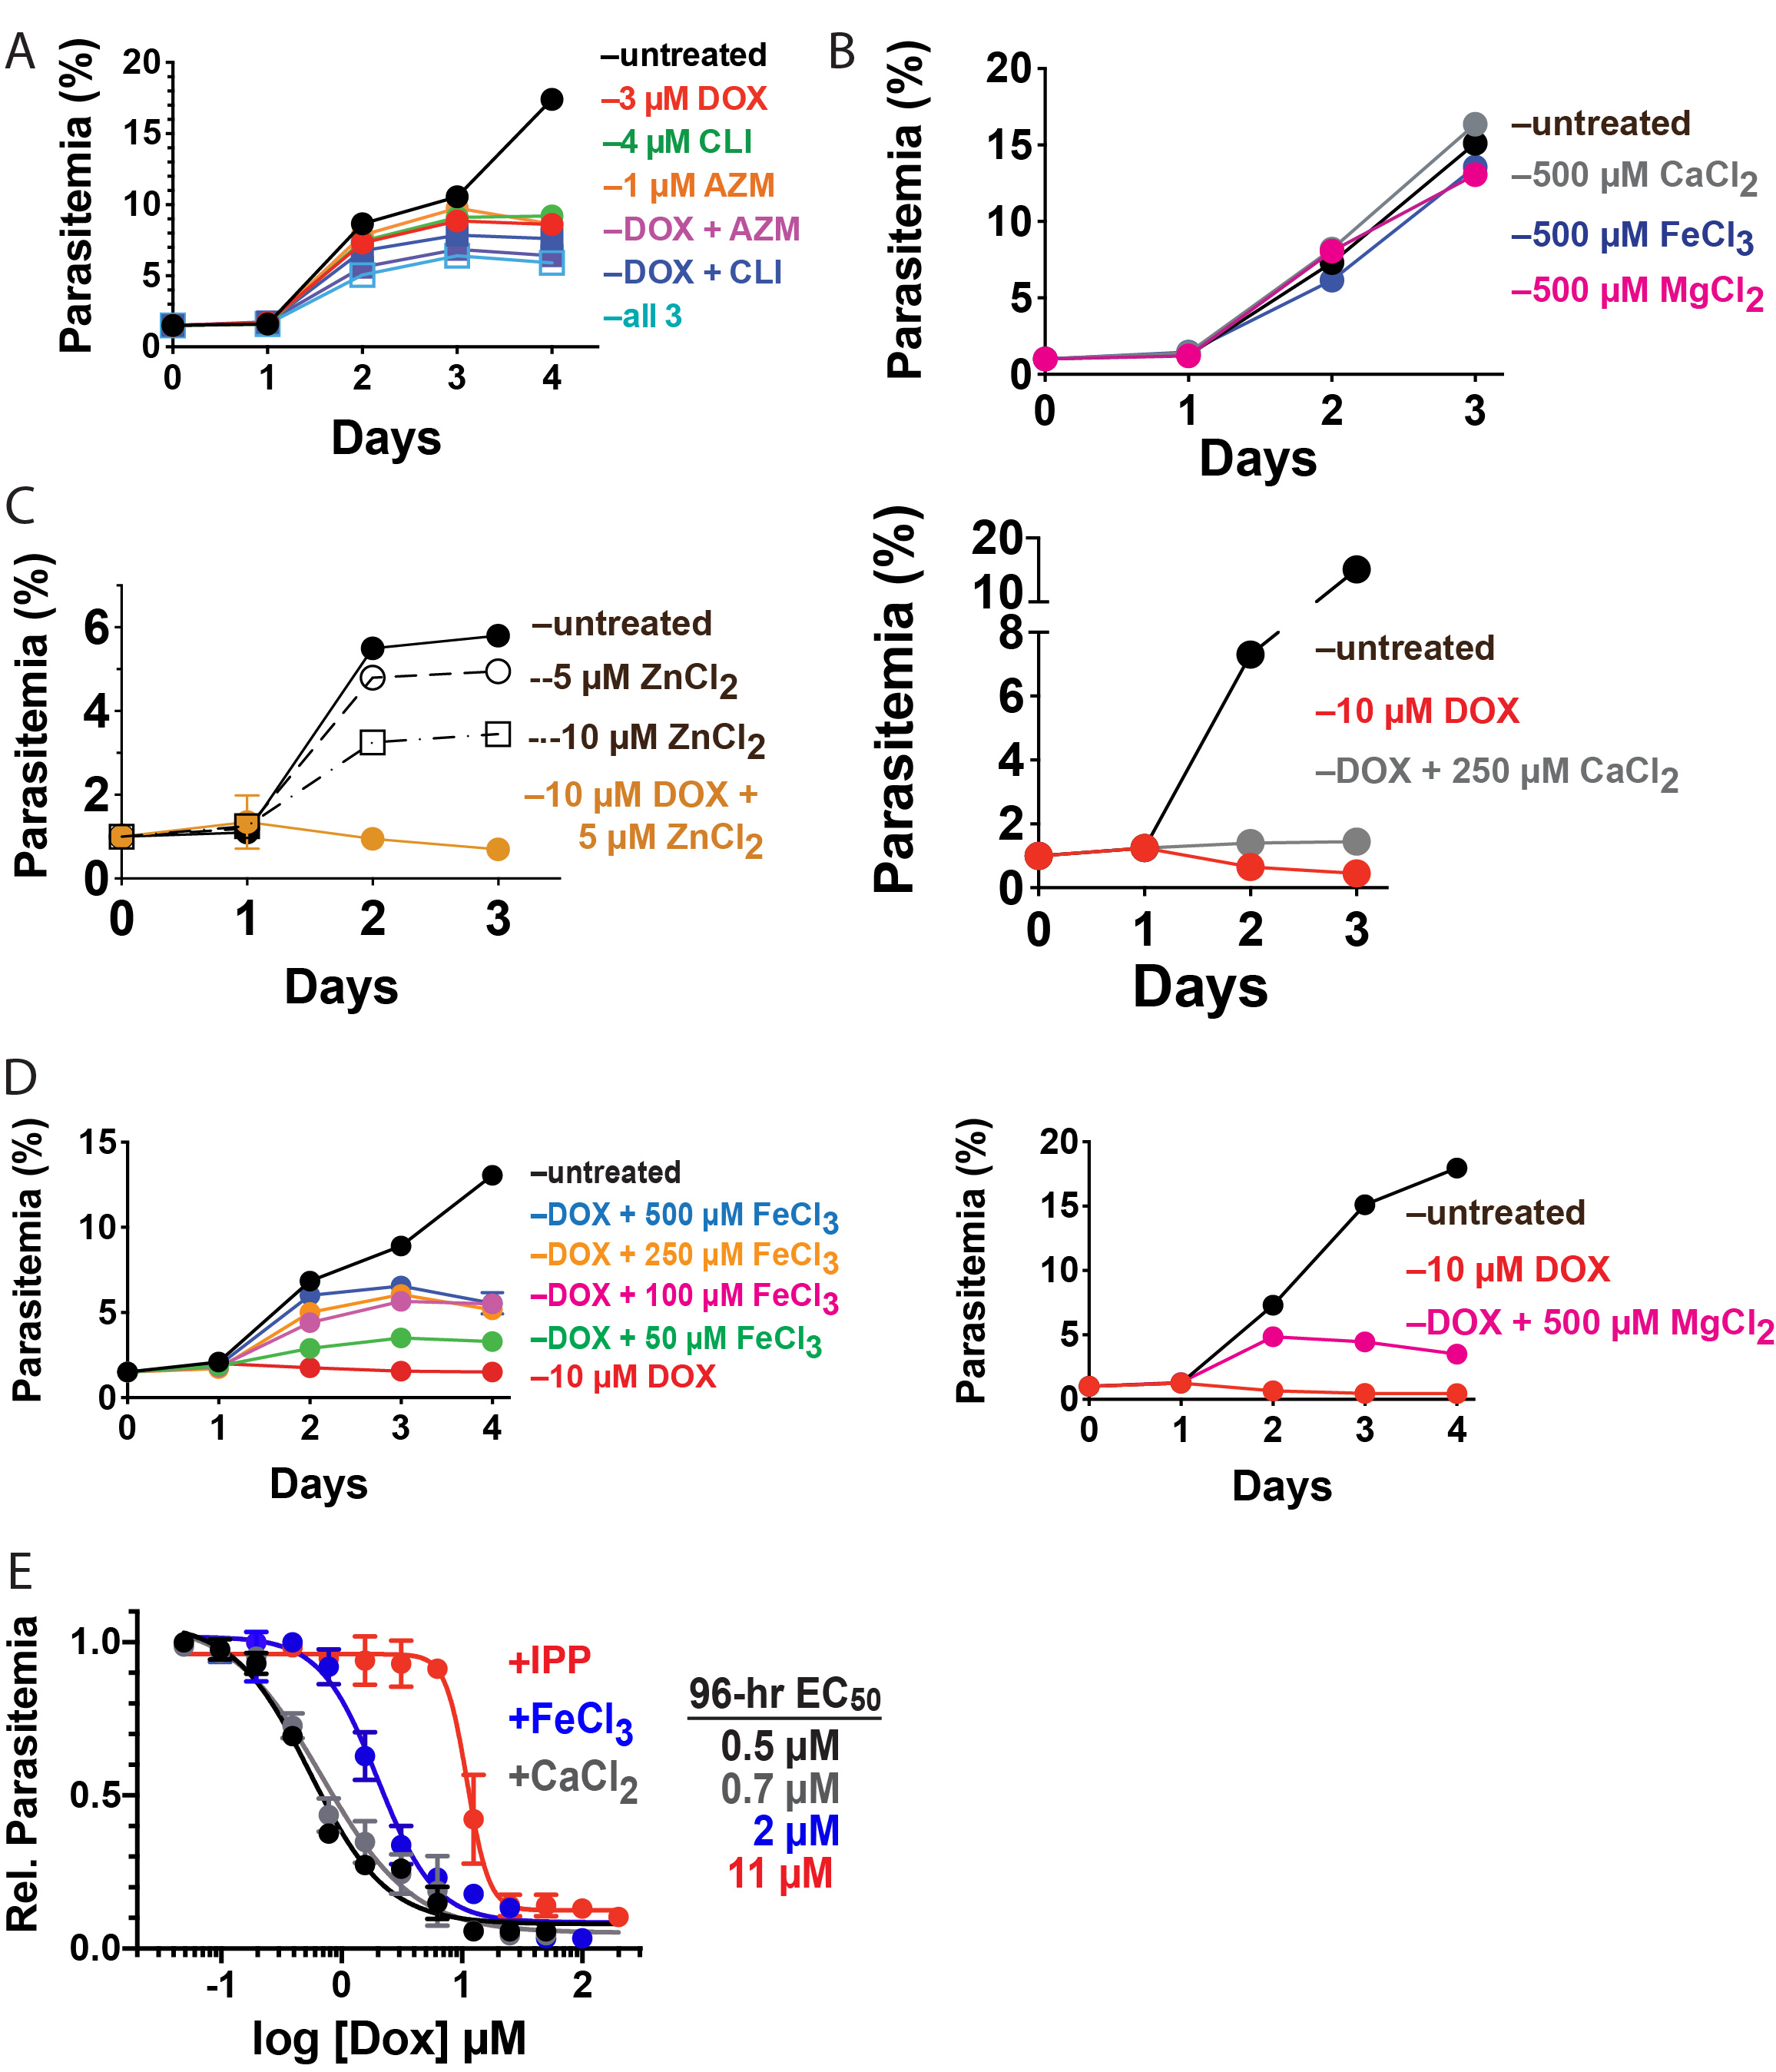

Supplement: supp [file elife-60246-supp-v1.zip › elife_poa_e60246_Figure_3_figure_supplement_1.jpg]

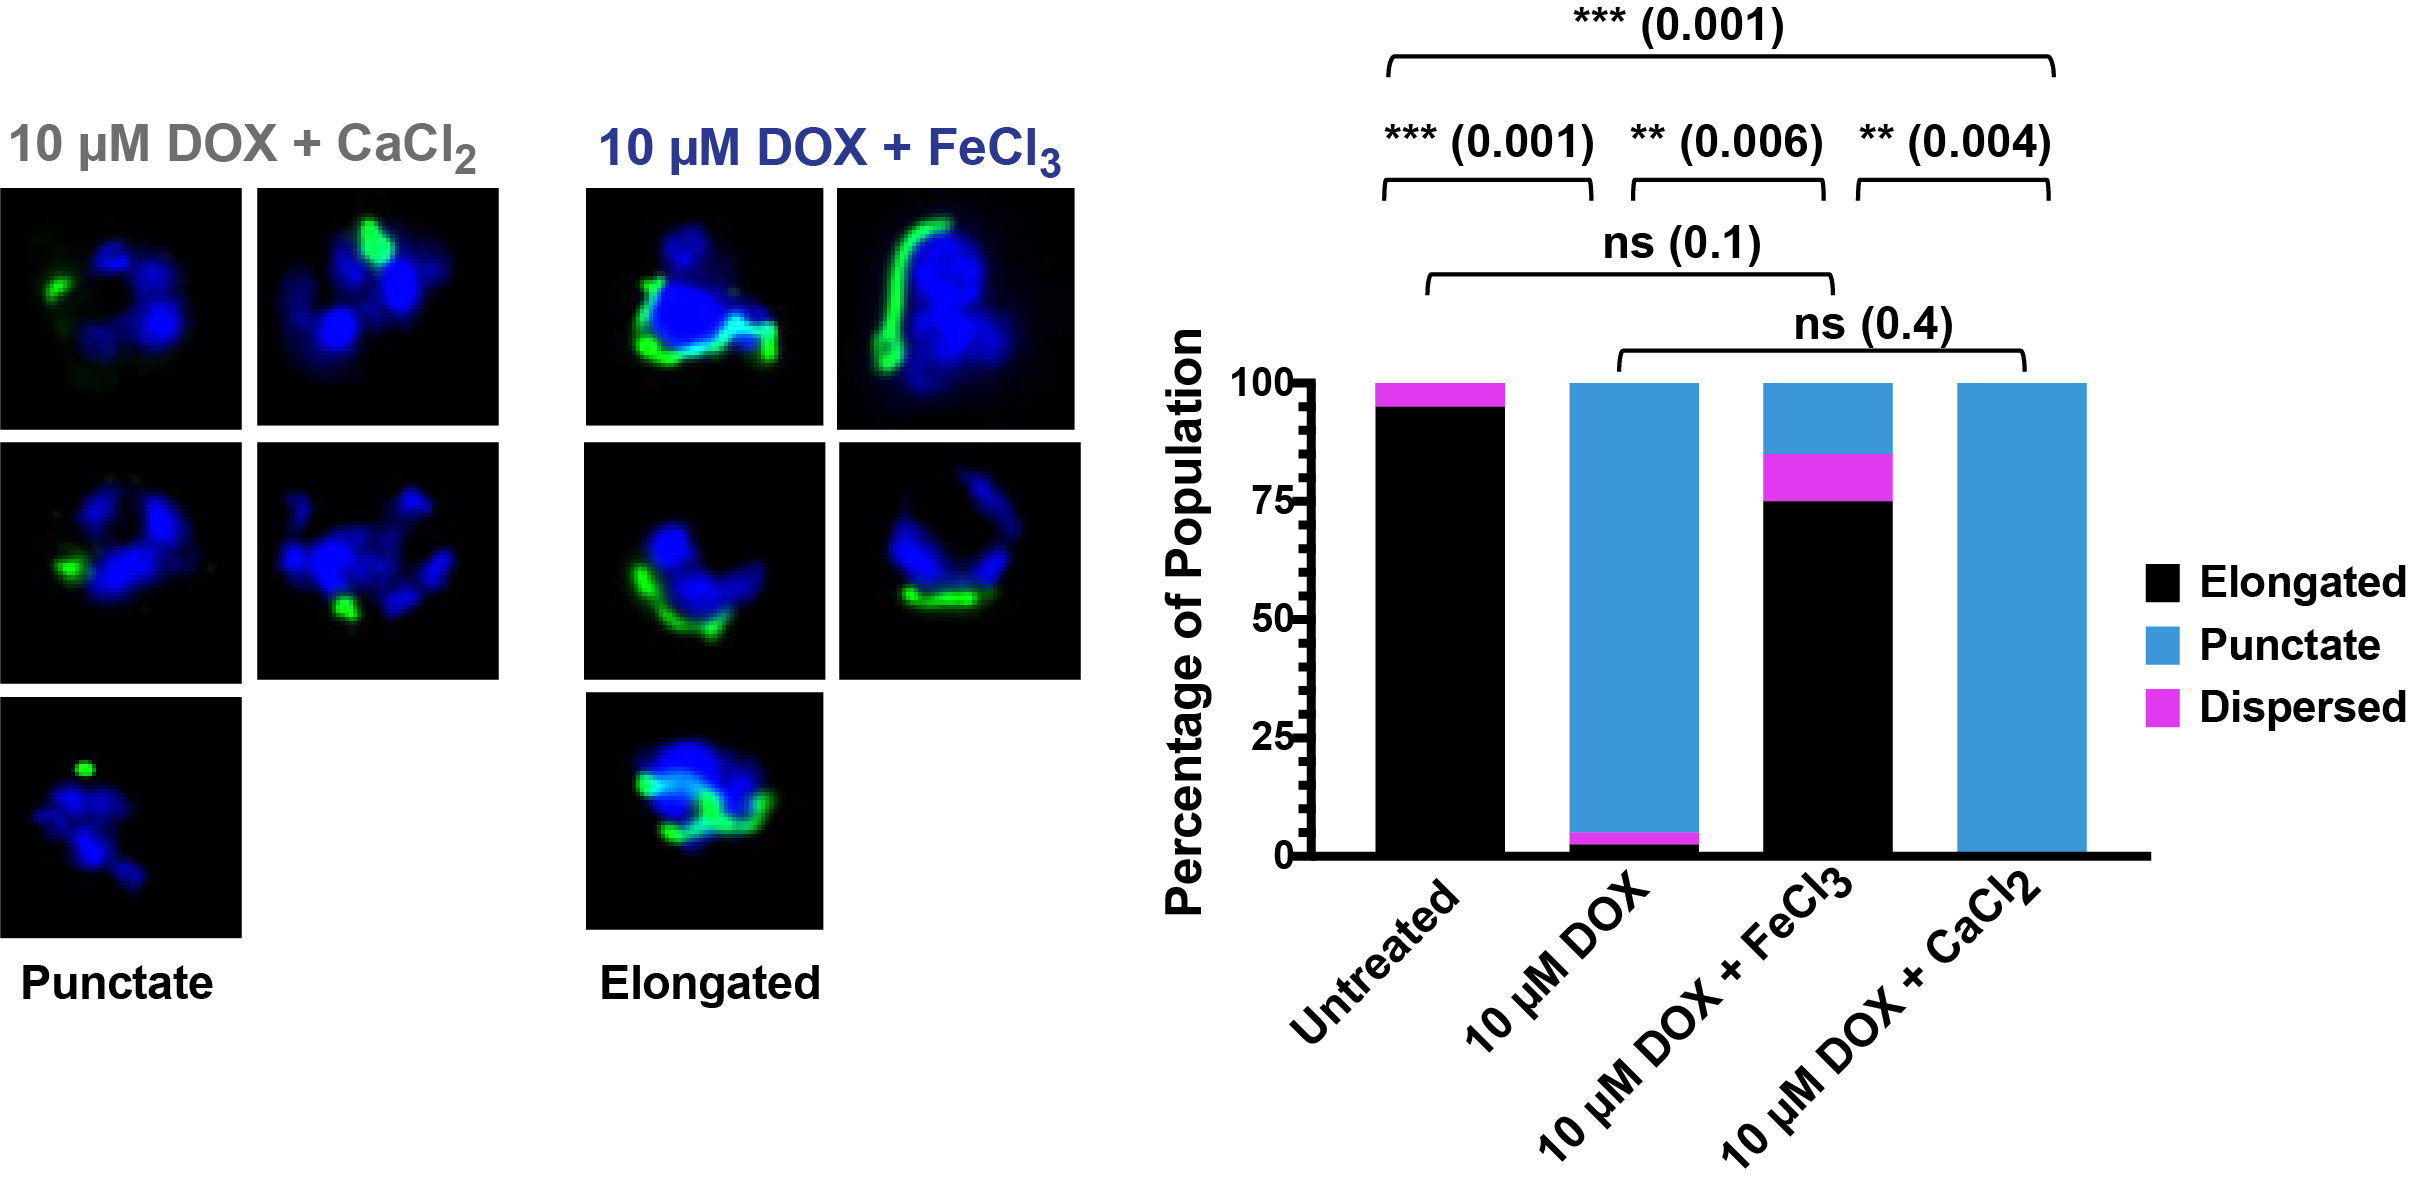

Supplement: supp [file elife-60246-supp-v1.zip › elife_poa_e60246_Figure_3_figure_supplement_2.jpg]

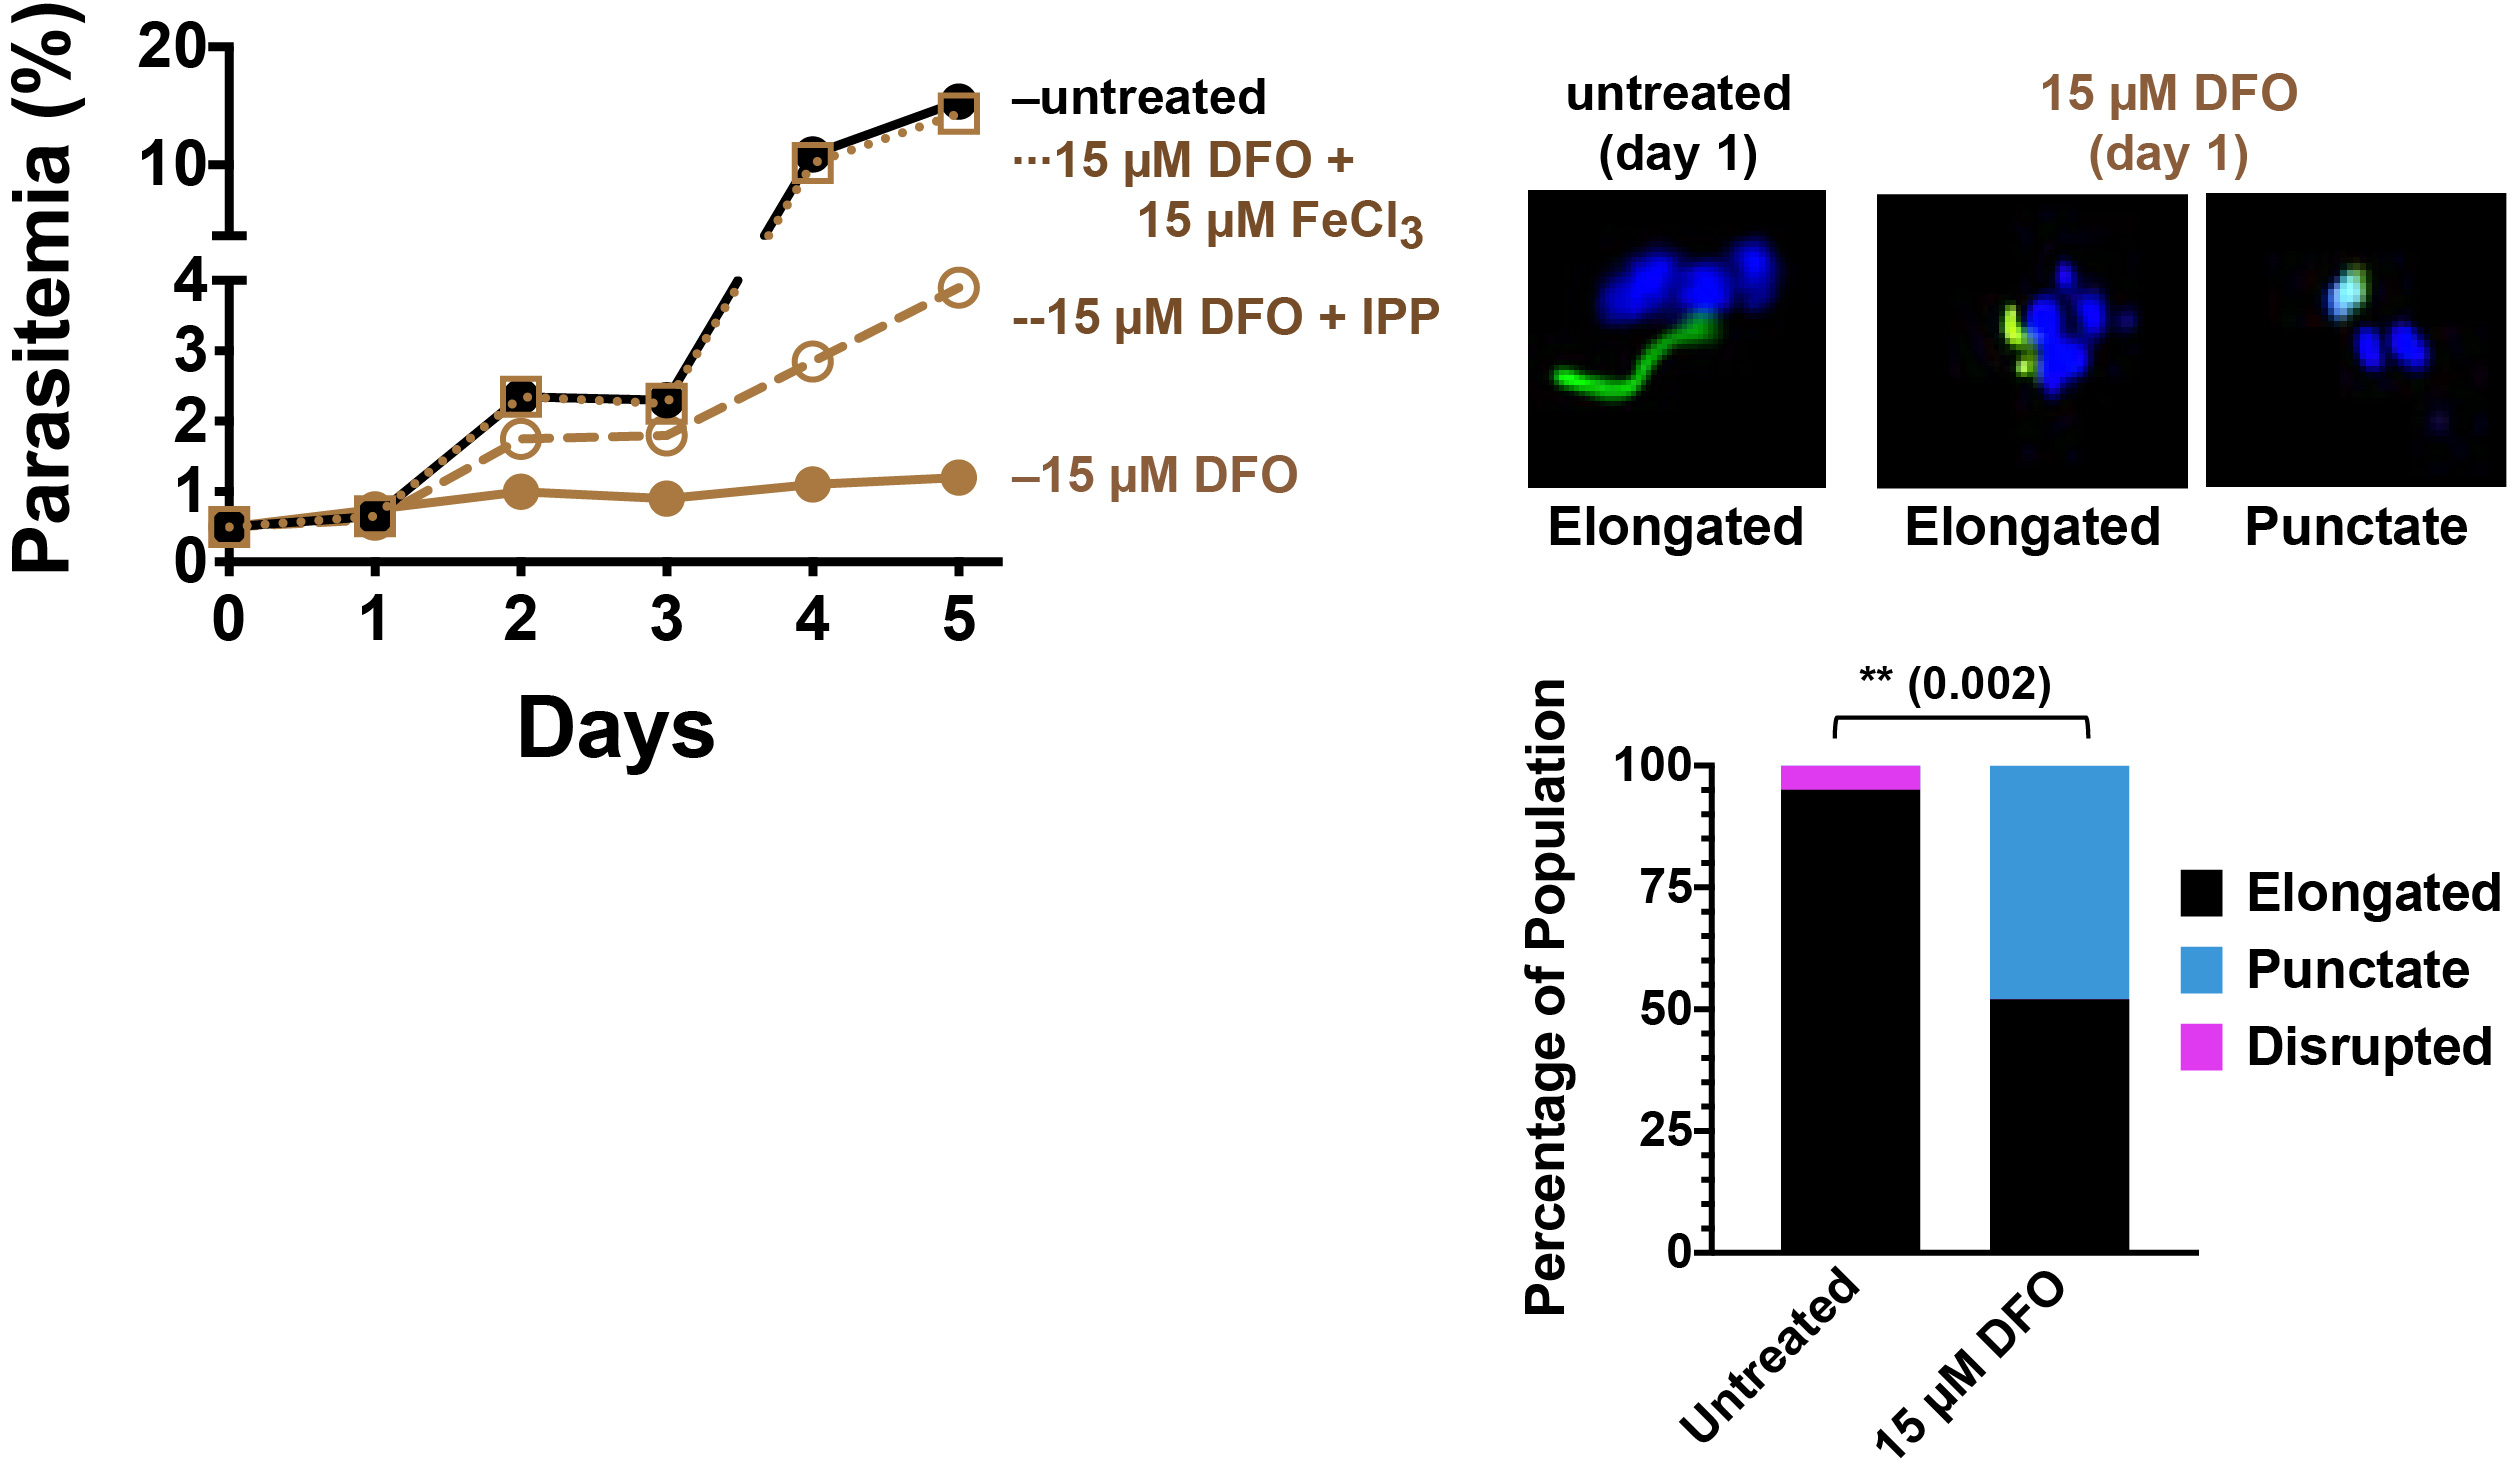

Supplement: supp [file elife-60246-supp-v1.zip › elife_poa_e60246_Figure_3_figure_supplement_3.jpg]
